# Supplementary material for: Phosphorus nitride nano-dots as a versatile and metal-free support for efficient photoelectrochemical water oxidation
Source: Royal Society of Chemistry journal article supplement (doi:10.1039/d1cc01030a), 2021-01-01
Supplement: d1cc01030a1.pdf [file d1cc01030a1.pdf]

**Supplementary Information:**

**Phosphorous nitride dots as a versatile and metal-free support for efficient  
photoelectrochemical water oxidation**

Tushar Kanta Sahu, Suhaib Alam, Sourav Bhowmick, Manoj Kumar Mohanta and  
Mohammad Qureshi\*

Department of Chemistry, Indian Institute of Technology Guwahati, Guwahati, Assam  
781039, India

## **EXPERIMENTAL**

### **Materials**

Phosphonitrilic chloride trimer (PCT) (99%), bismuth nitrate pentahydrate (99.99%), p-benzoquinone (98%), vanadyl acetylacetonate (98%), TritonX-100, iron(III) nitrate nonahydrate (99.95%), titanium tetraisopropoxide (97%) and 2-methoxyethanol (99.8%) were purchased from Sigma-Aldrich. Potassium iodide (99%), sodium hydroxide (99%), potassium hydroxide (99%) and sodium sulphate (99%) were purchased from Merck. Fluorine doped tin oxide coated glass slide (2.3 mm thickness, 7Ω/sq) was purchased from Sigma-Aldrich. Dialysis Membrane-70 (12-14 kDa molecular weight cutoff) was purchased from HiMedia.

### **Synthesis of nano-sized phosphorus nitride dots (PNDs)**

The PNDs were synthesized by solvo-thermal method following reported method.<sup>18</sup> In a typical synthesis, 20 mg phosphonitrilic chloride trimer (PCT) were mixed with 20 mL ethanol and transferred into a teflon lined autoclave and treated at 180 °C for 12 h. After the completion of the hydrothermal reaction, this autoclave was allowed to cool down at room temperature and obtained solution was filtered through 0.22 μm syringe filter, in order to separate the larger particles. This filtered solution was then dialyzed through a dialysate bag (Dialysis Membrane-70, HiMedia) against Milli-Q water at 25°C for 24 h. The water used in this process changed after every 6 h. The obtained PNDs were kept at room temperature for further use.

### **Fabrication of PND photoelectrode**

1mL of PND (1mg/mL) solution in ethanol was mixed with 50μL of Nafion and sonicated for 1 h to make a uniform solution. 50μL of the above solution was drop-casted over a cleaned FTO substrate and dried at 60°C for 2 h. This procedure was repeated three times to

make the PNDs film. After the drop-casting and drying process, the films were heated at 100°C for 3 h to obtain the PNDs photoelectrode film.

### **Preparation of Fe<sub>2</sub>TiO<sub>5</sub> Photoanodes**

Drop-casting method was applied to prepared Fe<sub>2</sub>TiO<sub>5</sub> photoanode over FTO substrate. Firstly, a solution consist of iron(III) nitrate nonahydrate, titanium tetraisopropoxide, acetylacetone, 2-methoxyethanol and water in the molar ratio of 2 : 1 : 4 : 20 : 26 was prepared. For this, titanium tetraisopropoxide was added to the mixed solution of acetylacetone and 2-methoxyethanol, which was further added to the aqueous solution of iron(III) nitrate nonahydrate. To the above solution 0.1 M of TritonX-100 was added and stirred for 1 h. 50μL of the as prepared solution was drop-casted over the FTO substrate (1 × 1 cm<sup>2</sup> area) and dried in a hot-air oven for 1 h at 100°C. Then, the films were calcined at 700°C for 15 min.

### **Preparation of BiVO<sub>4</sub> and BiVO<sub>4</sub>-PNDs photoanodes**

BiVO<sub>4</sub> photoanodes were prepared according to a reported method.<sup>1</sup> As prepared BiVO<sub>4</sub> photoanodes were sensitized in a fixed concentrations of PNDs solution for 5, 10 and 15 h at room temperature to fabricate BiVO<sub>4</sub>-PNDs. After the sensitization process, the films were cleaned with DI water to remove the excess PNDs at the surface. Then the films were then dried at 100°C for 6 h. WO<sub>3</sub>-PNDs and Fe<sub>2</sub>TiO<sub>5</sub>-PNDs photoanodes were fabricated by following above procedure only replacing BiVO<sub>4</sub> photoanode with WO<sub>3</sub> and Fe<sub>2</sub>TiO<sub>5</sub>.

### **Material Characterizations**

The XRD analysis was carried out in Rigaku SmartLab9kW diffractometer using Cu Kα ( $\lambda$  = 1.54 Å) as the source with 9kW power. XPS analysis were carried out using an ESCALAB

Xi+ (Made: Thermo-Fisher Scientific Pvt. Ltd., UK) photoelectron spectrometer with a monochromatized Al-K $\alpha$  ( $h\nu = 1486.6$  eV) X-ray source. FESEM was carried out using Zeiss (model- Sigma-300) instrument operated at 5 kV for surface morphology observation. FETEM was carried out using JEOL (JEM-2100F) instrument with an operating voltage of 200 kV for the morphology of the samples. UV-Visible absorption spectra were recorded on a Shimadzu (UV-2600) spectrometer by using BaSO<sub>4</sub> as the reference. A PerkinElmer (Spectrum-II) instrument was used to obtain the FT-IR spectra in KBr pellets. For the measurement of zeta potential, ZETASIZER Nano series (Malvern, Nano-ZS90) instrument was used. PL spectra were recorded in Horiba Scientific Fluoromax-4 spectrophotometer.

### Photoelectrochemical Characterizations

The PEC properties were measured using a potentiostat (Model-CHI1120B, CH Instruments, Inc., Austin, TX) in a standard three-electrode system using Pt counter electrode and saturated Ag/AgCl reference electrode. A simulated Sun with AM 1.5G (100 mW/cm<sup>2</sup>, Photo Emission Tech., Inc., Model-300WSS-PC) was used as illumination source and a 0.5M potassium borate aqueous solution (KBi, pH=11) was used as the electrolyte. For WO<sub>3</sub> based photoanodes, 0.1M Na<sub>2</sub>SO<sub>4</sub> (pH=6) was used as electrolyte. For Fe<sub>2</sub>TiO<sub>5</sub> based photoanodes, 1M NaOH (pH=12.6) was used as electrolyte. The measured potentials vs. Ag/AgCl were converted to the reversible hydrogen electrode (RHE) scale using the following equations:

$$E_{\text{RHE}} = E_{\text{Ag/AgCl}} + (0.059 \times \text{pH}) + E^{\circ}_{\text{Ag/AgCl}} \quad (1)$$

$$E^{\circ}_{\text{Ag/AgCl}} = 0.1976 \text{ vs. RHE} \quad (2)$$

Epoxy adhesive (Araldite®) was used to cover the photoanodes with an exposed area of 0.25 cm<sup>2</sup>. Before PEC measurements the electrolyte was purged with N<sub>2</sub> gas to remove dissolved oxygen. The IPCE analysis was obtained using a monochromatic light by a Newport Oriel IQE-200 instrument with a 250 W quartz tungsten halogen (QTH) lamp as the light source. EIS

measurements were analysed with electrochemical workstation (CHI760D). The gas evolution test was carried out in a closed system in an air-tight cell at 1.23V vs. RHE under AM 1.5 illumination.

### **Gas detection test**

The gases evolved were measured with an online gas chromatograph (model- Agilent 7820A) at every 10 min interval. For the measurement of gas, a closed PEC cell was used. Before the experiment, the cell was de-aerated with N<sub>2</sub> gas for 3 h to exclude the presence of dissolved oxygen. A constant flow of N<sub>2</sub> was maintained during the gas detection test. Blank test was done in regular interval before irradiation to demonstrate that the oxygen present in the system comes to a constant value. The gas evolved was also measured in the dark condition to rule out the contribution of dark current and minimizes the error in the calculation of faradaic yield. After irradiation, with regular interval of time the gas evolved was measured with the help of the Gas Chromatograph (Argon as carrier gas). A theoretical gas evolution rate was calculated from the current (I) vs. time (t) curve measured at 1.23V vs. RHE.

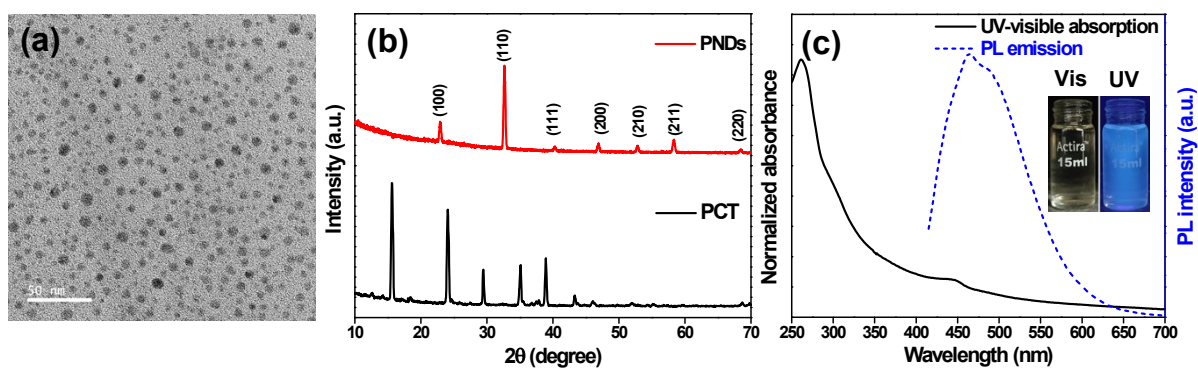

**Figure S1.** (a) FETEM image of PNDs, (b) Powder X-ray diffraction analysis of phosphonitrilic chloride trimer (PCT) used as precursor and as synthesized PNDs. XRD of as synthesized PNDs can be clearly distinguished from the XRD of precursor, and (c) UV-visible absorption spectrum (solid line) and photoluminescence spectrum (dash line) of PNDs (inset showing the photographs of PNDs under visible and UV lights). A strong blue fluorescence can be observed for PNDs under UV light.

**Table S1.** Rietveld refined powder XRD data of PNDs

| Compound | a(Å)    | b(Å)    | c(Å)    | $\alpha$ | $\beta$ | $\gamma$ | Volume  | $R_{wp}$ | $R_{ex}$ | $\chi^2$ |
|----------|---------|---------|---------|----------|---------|----------|---------|----------|----------|----------|
| PNDs     | 3.87528 | 3.87528 | 3.87528 | 90       | 90      | 90       | 58.1983 | 29       | 25.58    | 1.28     |

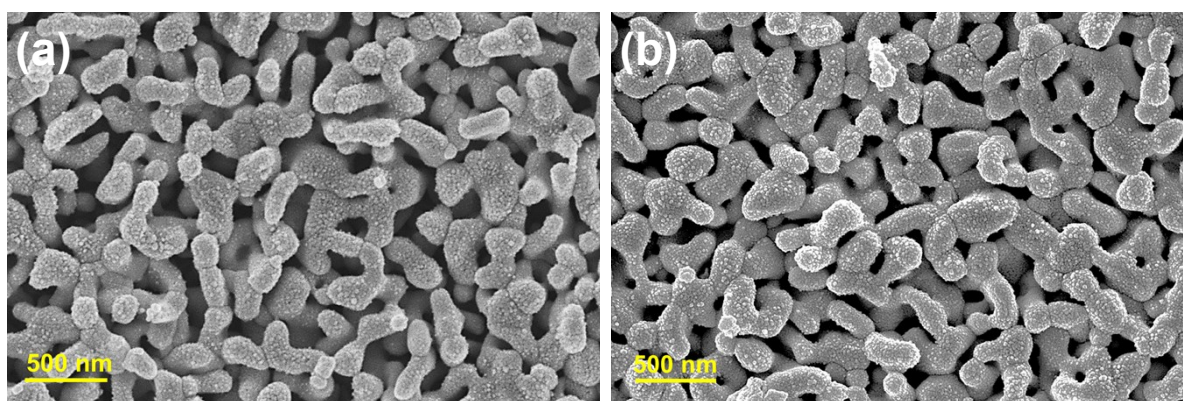

**Figure S2.** FESEM images of (a) bare BiVO<sub>4</sub> and (b) BiVO<sub>4</sub>-PND.

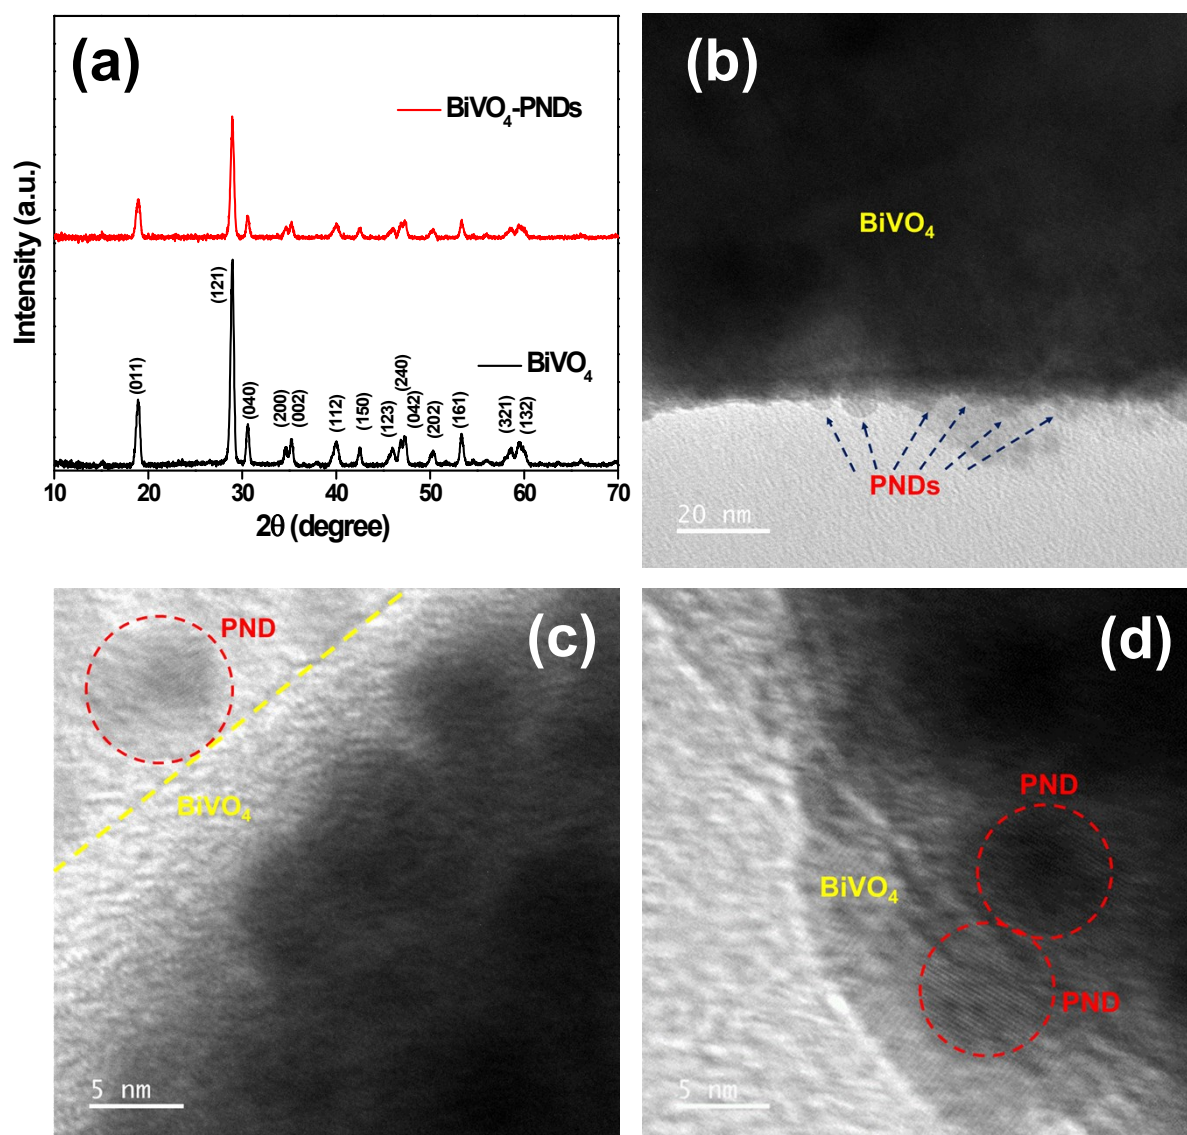

**Figure S3.** (a) Powder X-ray diffraction analysis of  $\text{BiVO}_4$  and  $\text{BiVO}_4\text{-PNDs}$ , (b) The FETEM image of  $\text{BiVO}_4\text{-PNDs}$ , and (c, d) HRTEM of  $\text{BiVO}_4\text{-PNDs}$  with distinguished and clear lattice fringes of PNDs over  $\text{BiVO}_4$ .

The HRTEM of  $\text{BiVO}_4\text{-PNDs}$  shows the presence of PNDs with distinguished and clear lattice fringes corresponds to (200) plane of cubic PNQD with a *d-spacing* of 0.19 nm.

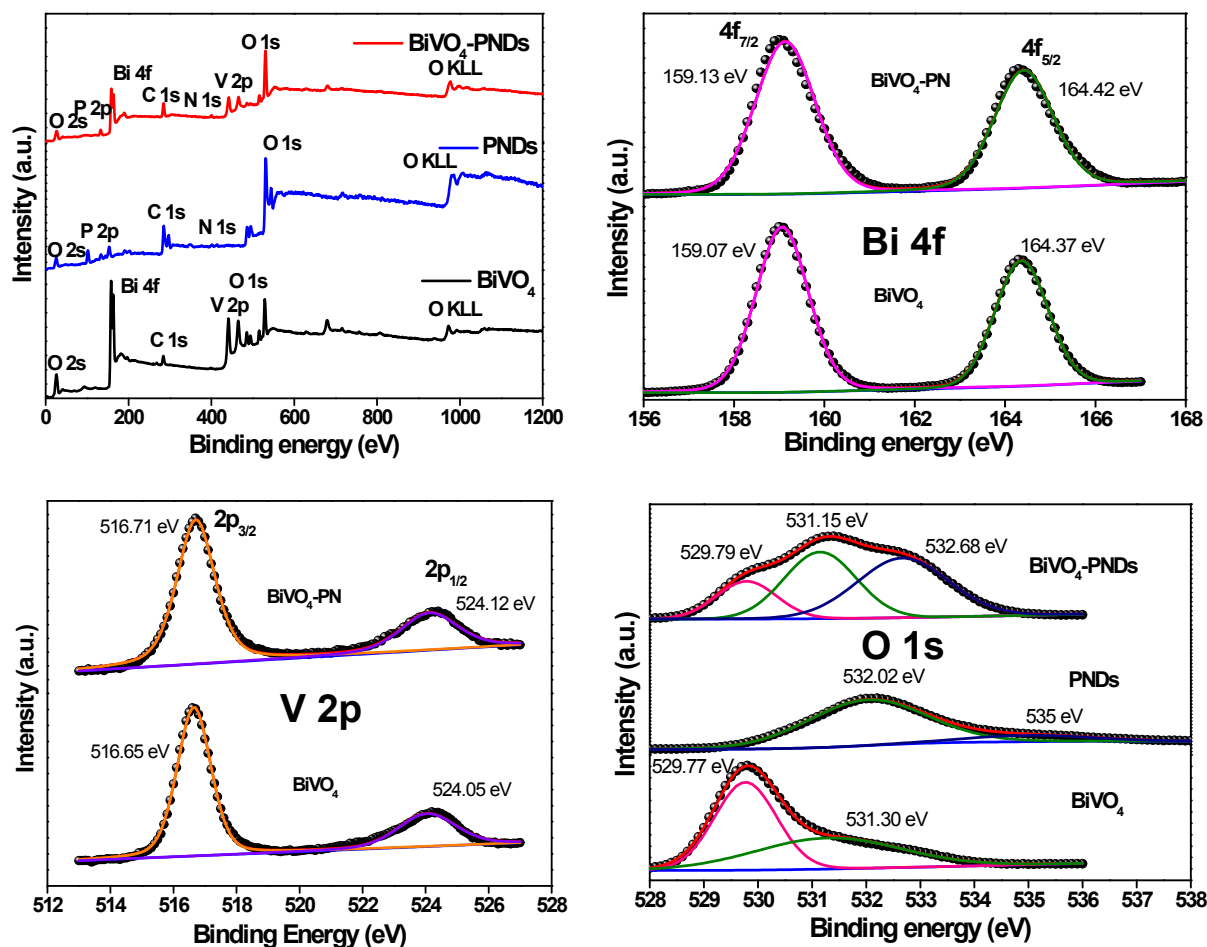

**Figure S4.** (a) XPS survey spectra of  $\text{BiVO}_4$ , PNDs and  $\text{BiVO}_4$ -PNDs, High resolution XPS core level spectra of (b) Bi 4f, (c) V 2p, and (d) O1s core-level spectra of  $\text{BiVO}_4$ , PNDs and  $\text{BiVO}_4$ -PNDs. The additional peak for  $\text{BiVO}_4$ -PNDs at 532.68 eV corresponds to adsorbed hydroxyl/water molecules.

Figure S4(a) shows the XPS survey spectra of  $\text{BiVO}_4$ , PNDs and  $\text{BiVO}_4$ -PNDs which confirms the presence of all the constituent elements. The O 1s core-level spectra of PNDs shown in Figure S4(d) shows two peaks at 532.02 eV and 535 eV corresponds to surface hydroxyl group (P-OH) and adsorbed water molecules. The O 1s core-level spectra of  $\text{BiVO}_4$ -PNDs shown in Figure S4(d) shows an additional peak at 532.68 corresponding to surface adsorbed hydroxyl molecules due to incorporation of PNDs.

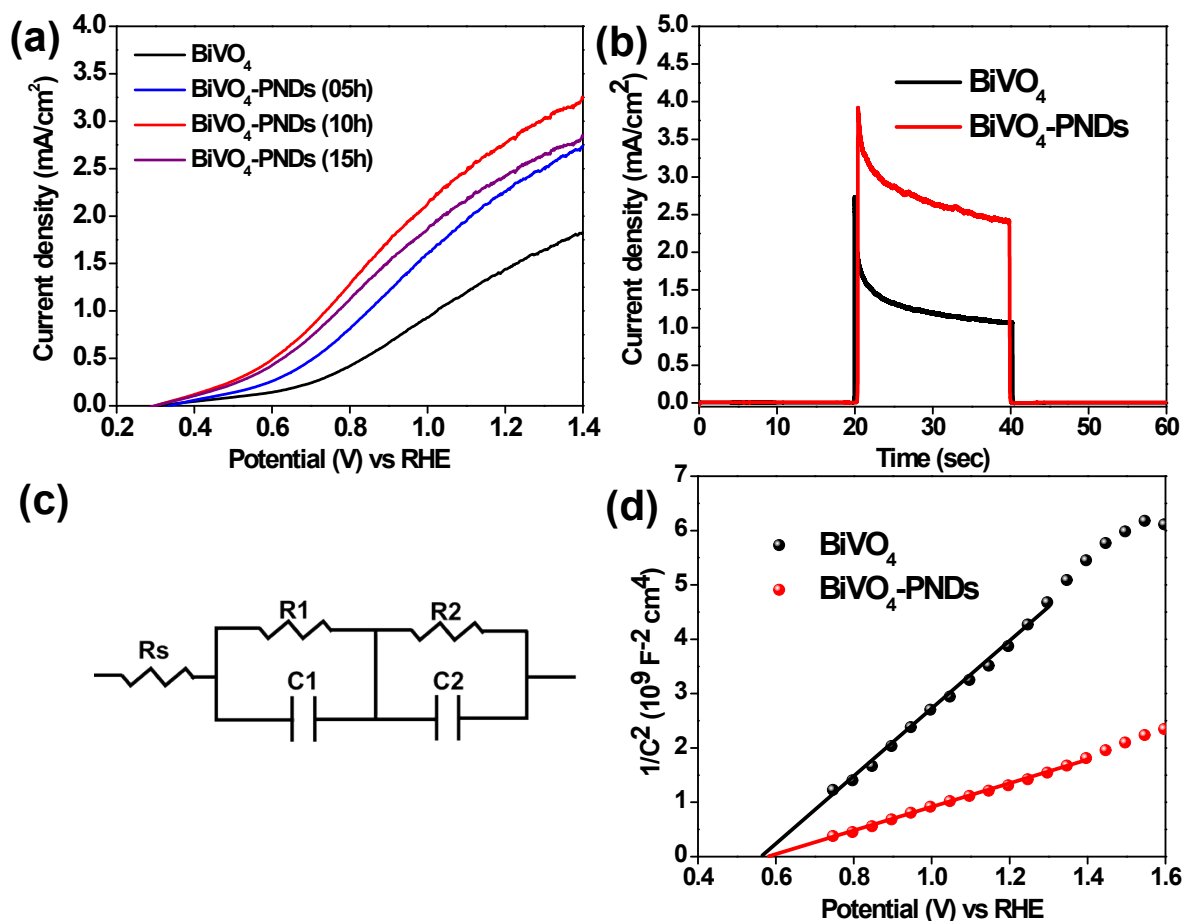

**Figure S5.** (a) J-V curves of BiVO<sub>4</sub>-PNDs with different dipping time for loading PNDs, (b) transient photocurrents of BiVO<sub>4</sub> and BiVO<sub>4</sub>-PNDs photoanodes at 1.23 V vs. RHE, (c) Equivalent circuit used for fitting Nyquist plots and (d) Mott-Schottky plots of BiVO<sub>4</sub> and BiVO<sub>4</sub>-PNDs photoanodes measured in dark conditions.

The optimized BiVO<sub>4</sub> photoanodes were treated with PNDs with different sensitization time i.e. 5h, 10h and 15h, as shown in Figure S5(a). 10 hours of sensitization with PNDs gives a maximum current density of 2.8 mA/cm<sup>2</sup>.

**Table S2.** Fitted results of Nyquist plot from the equivalent circuit and calculated carrier density from Mott-Schottky plot.

| <b>Systems</b>                                | <b><math>R_s</math> (<math>\Omega</math>)</b> | <b><math>R_1</math> (<math>\Omega</math>)</b> | <b><math>C_1</math> (<math>\mu\text{F}</math>)</b> | <b><math>R_2</math> (<math>\Omega</math>)</b> | <b><math>C_2</math> (<math>\mu\text{F}</math>)</b> | <b><math>N_D</math> (<math>\text{cm}^{-3}</math>)</b> |
|-----------------------------------------------|-----------------------------------------------|-----------------------------------------------|----------------------------------------------------|-----------------------------------------------|----------------------------------------------------|-------------------------------------------------------|
| <b><math>\text{BiVO}_4</math></b>             | 37                                            | 1687                                          | 3.8                                                | 80.5                                          | 4.9                                                | $4.11 \times 10^{19}$                                 |
| <b><math>\text{BiVO}_4\text{-PNDs}</math></b> | 32                                            | 783                                           | 10                                                 | 51                                            | 5.5                                                | $1.21 \times 10^{20}$                                 |

The Nyquist plot consists of two semicircles, where the low frequency region represents charge transfer kinetics at the interface of semiconductor/electrolyte and high-frequency region represents charge transfer kinetics at the bulk. In the equivalent circuit,  $R_s$  represents the solution resistance,  $R_1$  is the charge transfer behaviour at the semiconductor/electrolyte interface,  $C_1$  the capacitance at the semiconductor/electrolyte interface,  $R_2$  represents the charge transfer in the bulk of the semiconductor and  $C_2$  is the capacitance at the semiconductor surface.<sup>3</sup>

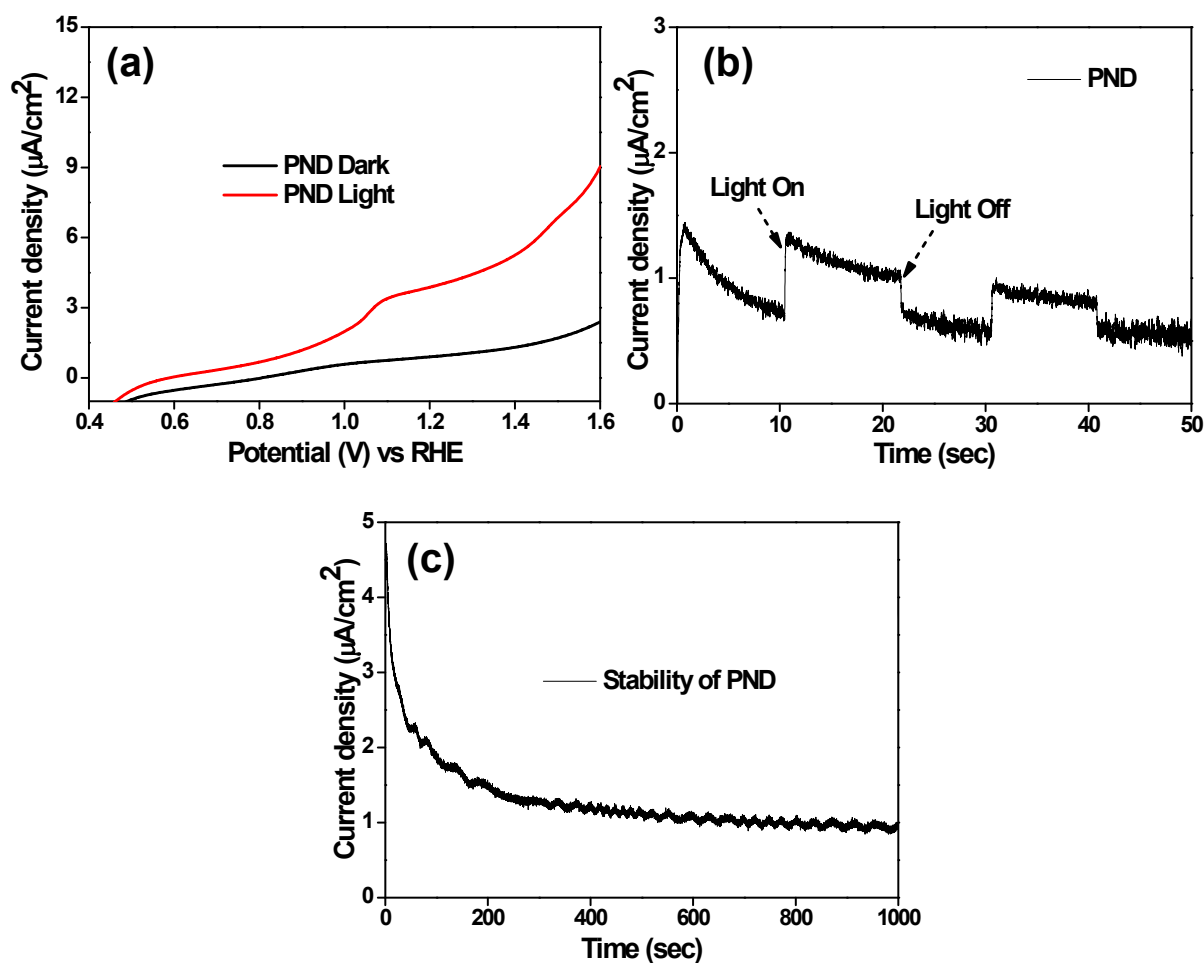

**Figure S6.** (a) J-V curves of PND photoanode in dark and under illumination, (b) chronoamperometry of PND photoanode in light ON-OFF condition and (c) operational stability of PND under constant illumination.

To gain more insights about the photoelectrochemical properties of bare phosphorus nitride we have fabricated the PND films by drop-casting method. Detailed fabrication procedure is added in the experimental section. Figure S6(a) shows the I-V curves of PND in the dark and under illumination. At 1.23V vs. RHE, a photocurrent density of 4  $\mu\text{A}/\text{cm}^2$  was obtained for whereas a current density of 1  $\mu\text{A}/\text{cm}^2$  was observed in dark condition which is further confirmed by the light ON-OFF response of the same as shown in Figure S6(b). The operational stability shown in Figure S6(c) shows that the stability of PND film decreased with time as the thin film of bare PNDs over FTO substrate was coming out after long term stability test, however, this

issue we did not find when sensitized onto the semiconductors ( $\text{BiVO}_4$ ,  $\text{WO}_3$  and  $\text{Fe}_2\text{TiO}_5$ ) presently studied.

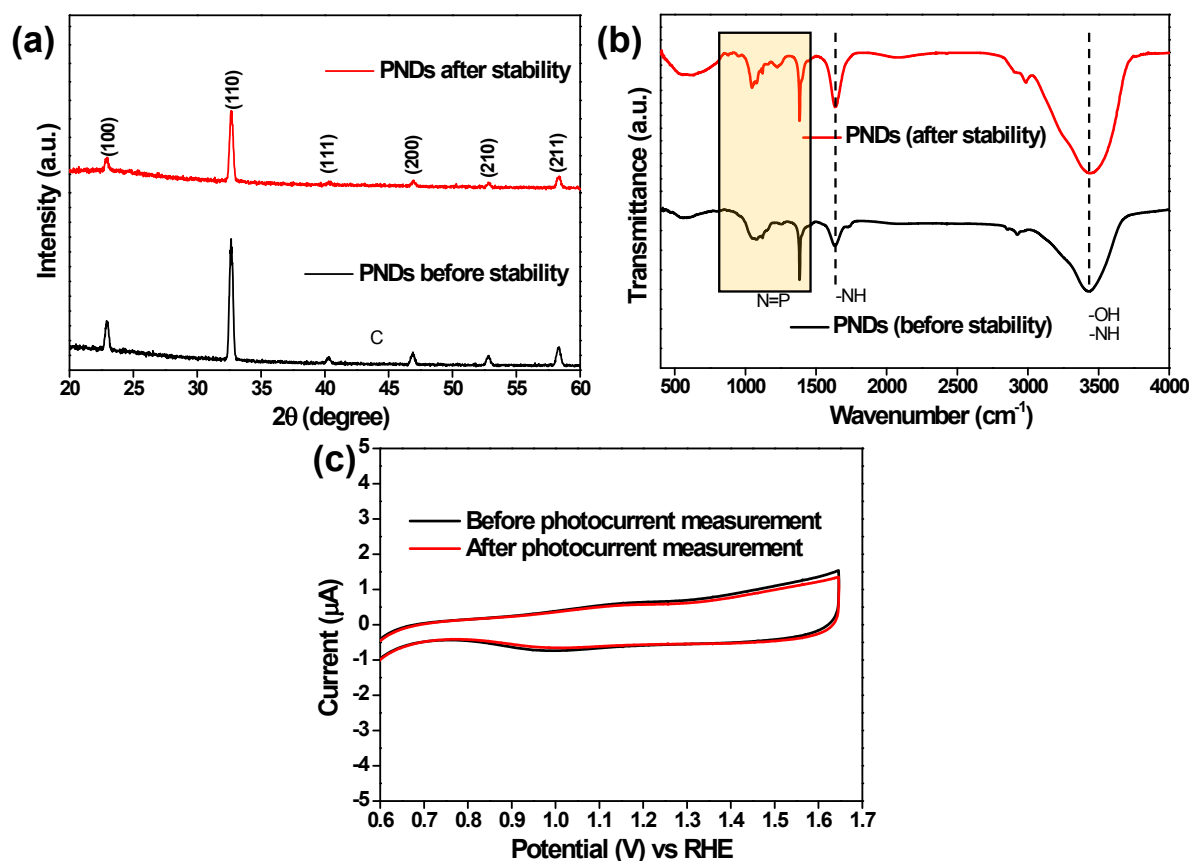

**Figure S7.** (a) XRD analysis of PNDs before and after stability test, (b) FTIR of PNDs before and after stability test and (c) cyclic voltammetry of PNDs before and after the photocurrent measurement.

The post PEC characterization of PNDs photoelectrode was analyzed to rule out the conversion of PNDs into oxidized products. As shown in Figure S7(a), no changes have been observed in the XRD of PNDs before and after the stability test, which confirmed that phase purity of PNDs is intact. Also, FTIR has been done to know the possibilities of conversion of PNDs to oxidized products, which shows that no additional peaks have been observed after the stability

test beside broadening of –OH peaks (Figure S7(b)). The cyclic voltammetry of PNDs also shows no changes before and after the photocurrent measurement as shown in Figure S7(c).

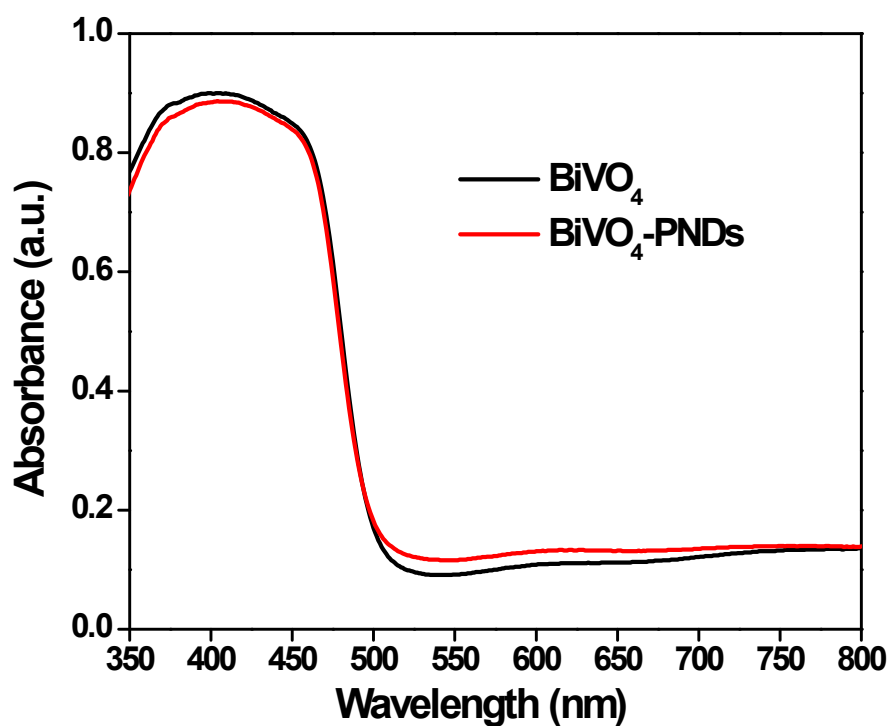

**Figure S8.** UV-visible absorption spectra of  $\text{BiVO}_4$  and  $\text{BiVO}_4$ -PNDs.

As shown in Figure S8, the light absorption of both  $\text{BiVO}_4$  and  $\text{BiVO}_4$ -PNDs are found to be comparable and has negligible effect in enhancing the photocurrent density.

Three fundamental processes involved in a photoanode during PEC water oxidation for getting photocurrent density ( $J_{\text{water}}$ ): light absorption in terms of current density ( $J_{\text{abs}}$ ), charge separation efficiency ( $\eta_{\text{sep}}$ ) within the material and charge injection efficiency ( $\eta_{\text{inj}}$ ) at the photoanode/ electrolyte interface. So, it can be expressed as:

$$J_{\text{water}} = J_{\text{abs}} \times \eta_{\text{sep}} \times \eta_{\text{inj}} \quad (3)$$

It is known that sulphite water oxidation kinetics are much faster and can be approximated to 100% compared to the general semiconductor water oxidation kinetics. The charge separation efficiency ( $\eta_{\text{sep}}$ ) was calculated using the following equation:

$$\eta_{\text{sep}} = \frac{J_{\text{sulphite}}}{J_{\text{abs}}} \quad (4)$$

where  $J_{\text{abs}}$  was the theoretical current density assuming the complete conversion of the absorbed irradiation. The surface charge injection efficiency ( $\eta_{\text{inj}}$ ) was calculated using the equation:

$$\eta_{\text{inj}} = \frac{J_{\text{water}}}{J_{\text{sulphite}}} \quad (5)$$

where ( $J_{\text{water}}$ ) was the current density acquired in the 0.5 M KBi without  $\text{Na}_2\text{SO}_3$ , ( $J_{\text{sulphite}}$ ) was the current density acquired in the presence of 0.2 M  $\text{Na}_2\text{SO}_3$  in 0.5 M KBi.

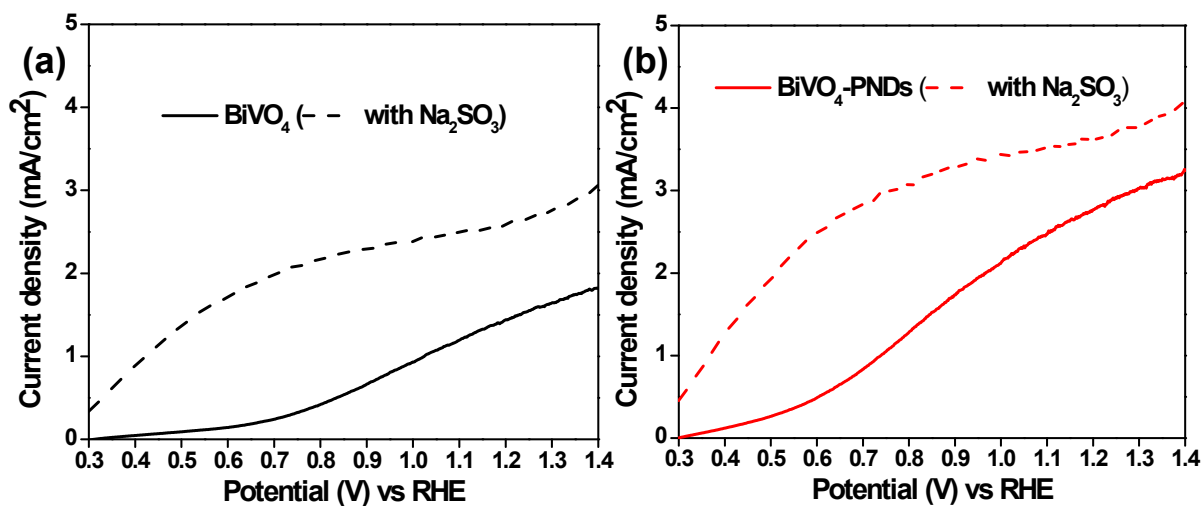

**Figure S9.** J–V curves of (a) BiVO<sub>4</sub> and (b) BiVO<sub>4</sub>-PNDs photoanodes for sulphite oxidation measured in a 0.5 M KBi electrolyte containing 0.2 M Na<sub>2</sub>SO<sub>3</sub> as hole scavenger.

The photocurrent density of BiVO<sub>4</sub> and BiVO<sub>4</sub>-PNDs with and without the presence of a hole scavenger is shown in Figure S9. It is known that sulphite water oxidation kinetics are much faster and can be approximated to 100% compared to the general semiconductor water oxidation kinetics. Based on this, the charge separation and charge injection efficiencies are obtained.

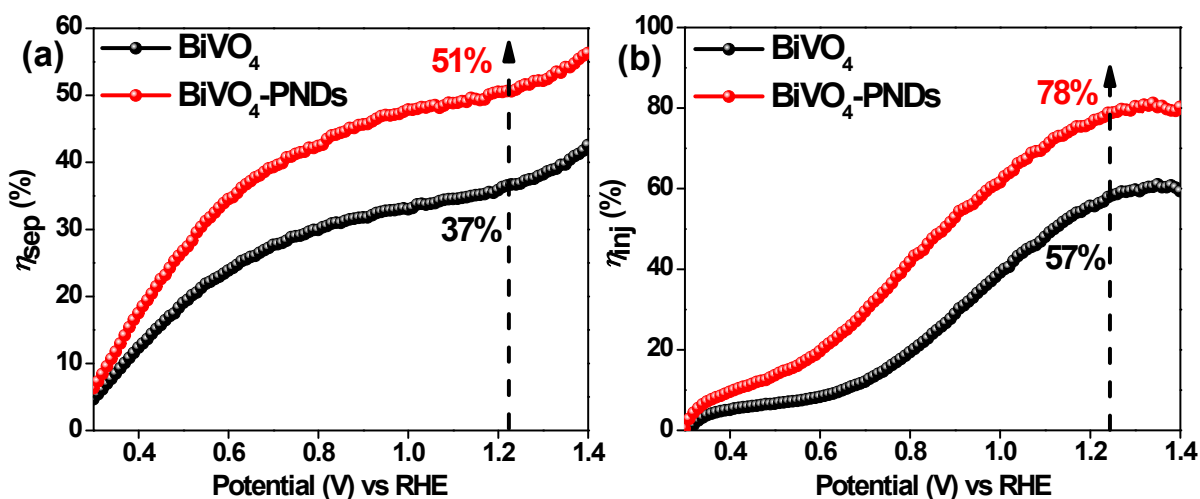

**Figure S10.** (a) Charge separation efficiency and (b) charge injection efficiency of BiVO<sub>4</sub> and BiVO<sub>4</sub>-PNDs photoanodes.

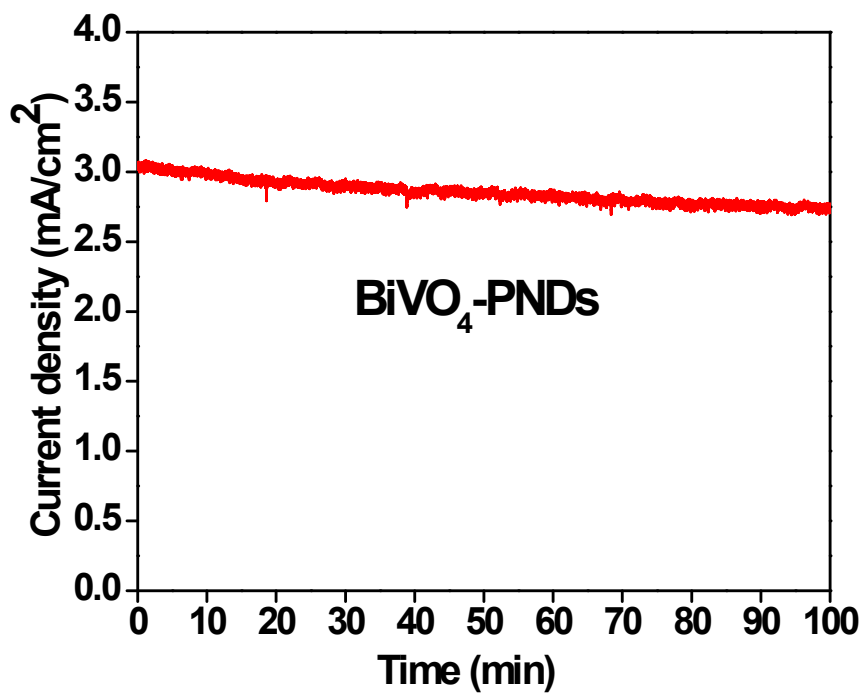

**Figure S11.** Operational stability of BiVO<sub>4</sub>-PNDs photoanode at 1.23 V vs. RHE under continuous light illumination.

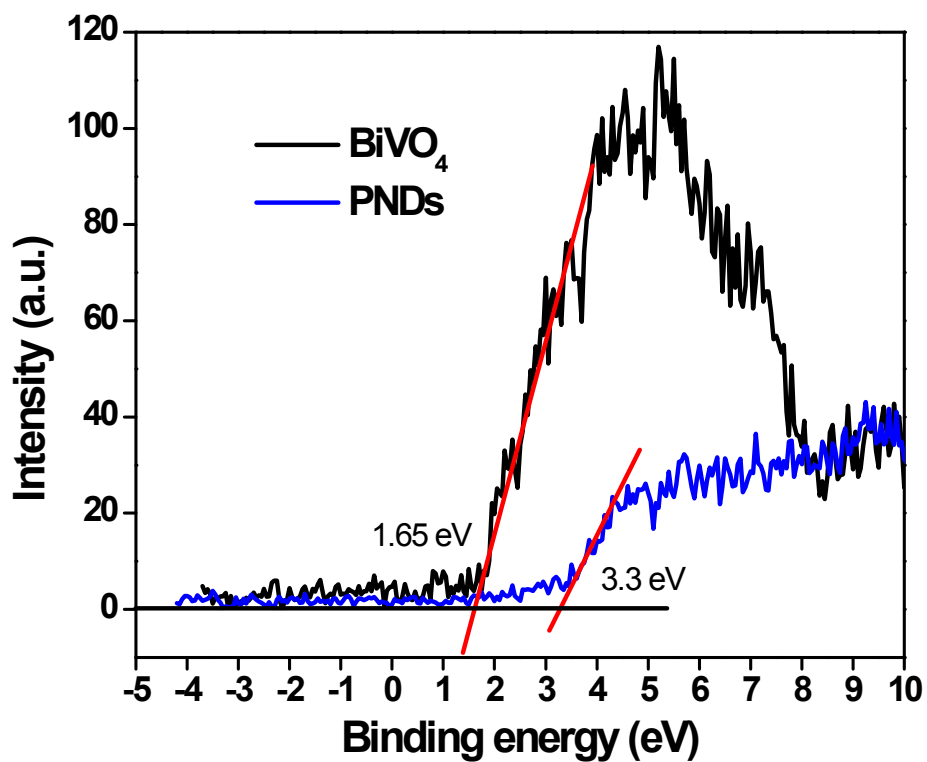

**Figure S12.** XPS valence band spectra of BiVO<sub>4</sub> and PNDs

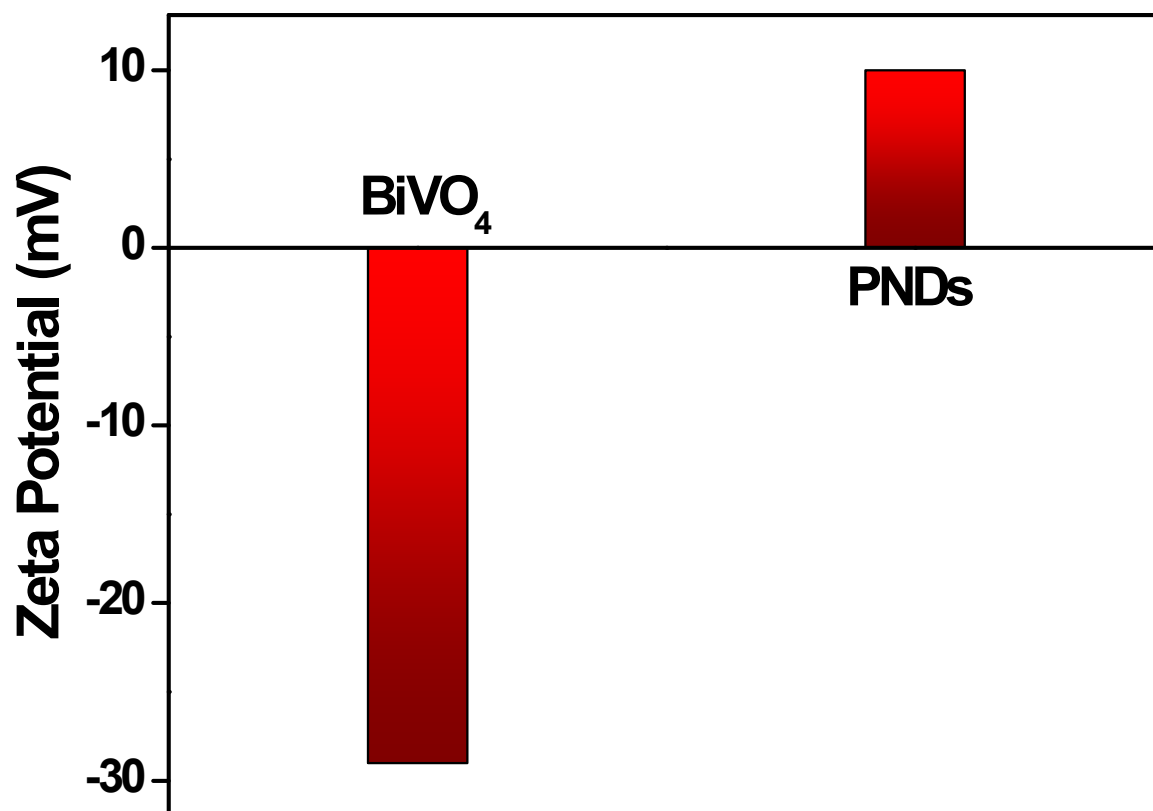

**Figure S13.** Zeta potential of BiVO<sub>4</sub> and PNDs in neutral medium.

Figure S13 shows the zeta potential of BiVO<sub>4</sub> and PNDs (prepared in deionized water at neutral pH). BiVO<sub>4</sub> shows a negative surface charge of -29 mV and PNDs shows a positive surface charge of +10 mV. Opposite surface charge of BiVO<sub>4</sub> and PNDs leads to formation of a heterojunction in the composite photoanode as a results of electrostatic interaction between BiVO<sub>4</sub> and PNDs.

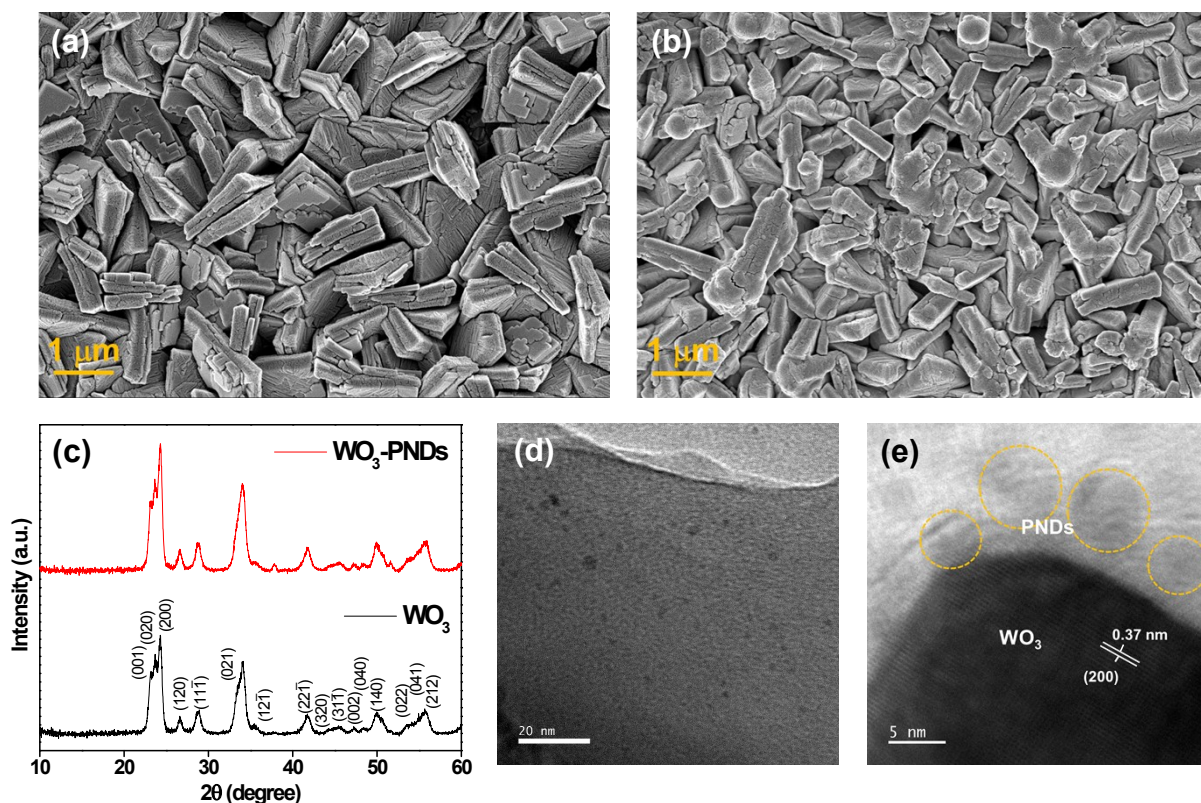

**Figure S14.** FESEM images of (a) WO<sub>3</sub> and (b) WO<sub>3</sub>-PNDs, (c) XRD of WO<sub>3</sub> and WO<sub>3</sub>-PNDs, (d) FETEM of WO<sub>3</sub>-PNDs and (e) HRTEM of WO<sub>3</sub>-PNDs.

The surface morphology of WO<sub>3</sub> were analyzed through FESEM (Figure S14(a,b)). The FESEM shows that there is no significant changes in the surface morphology of WO<sub>3</sub> after modification with PNDs. The crystal structure of the WO<sub>3</sub> was investigated by XRD analysis as shown in Figure S14(c). The XRD of WO<sub>3</sub> corresponds to monoclinic phase of WO<sub>3</sub> with JCPDS No. 05-0364 and FTO, which confirms the formation of WO<sub>3</sub> over the FTO substrate. After modification with PNDs, there is no change in the XRD pattern, indicating that PNDs does not change the crystal phase of WO<sub>3</sub>. The FETEM of WO<sub>3</sub>-PNDs shows the presence of nano-sized dots over WO<sub>3</sub> nanostructure (Figure S14(d)). The HRTEM of the composite photoanode shows d-spacing corresponds to WO<sub>3</sub> (0.37 nm, (200) plane) and PNDs (Figure 14(e)).

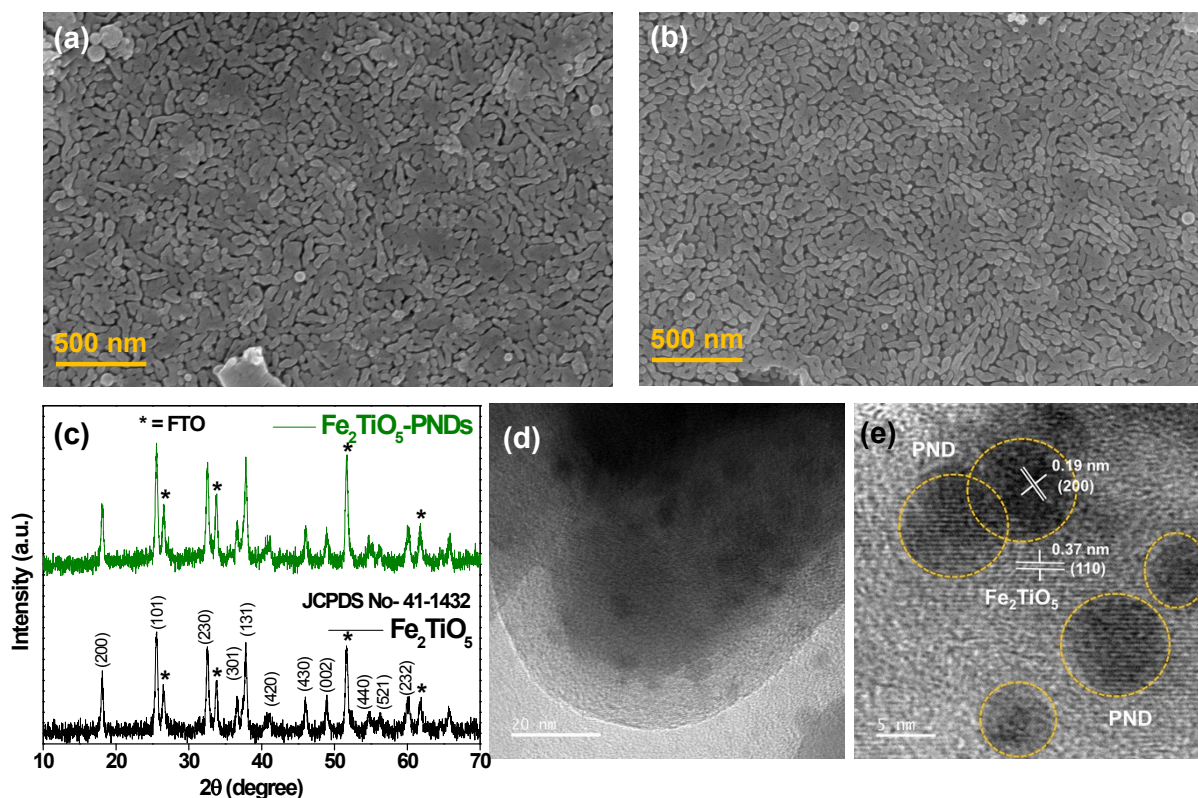

**Figure S15.** FESEM images of (a)  $\text{Fe}_2\text{TiO}_5$  and (b)  $\text{Fe}_2\text{TiO}_5$ -PNDs, (c) XRD of  $\text{Fe}_2\text{TiO}_5$  and  $\text{Fe}_2\text{TiO}_5$ -PNDs, (d) FETEM of  $\text{Fe}_2\text{TiO}_5$ -PNDs and (e) HRTEM of  $\text{Fe}_2\text{TiO}_5$ -PNDs.

The surface morphology of  $\text{Fe}_2\text{TiO}_5$  were analyzed through FESEM (Figure S15(a,b)). The FESEM shows that there is no significant changes in the surface morphology of  $\text{Fe}_2\text{TiO}_5$  after modification with PNDs. The crystal structure of the  $\text{Fe}_2\text{TiO}_5$  was investigated by XRD analysis as shown in Figure S15(c). The XRD of  $\text{Fe}_2\text{TiO}_5$  corresponds to pseudobrookite phase of  $\text{Fe}_2\text{TiO}_5$  with JCPDS No. 14-1432 and FTO, which confirms the formation of  $\text{Fe}_2\text{TiO}_5$  over the FTO substrate. After modification with PNDs, there is no change in the XRD pattern, indicating that PNDs does not change the crystal phase of  $\text{Fe}_2\text{TiO}_5$ . The FETEM of  $\text{Fe}_2\text{TiO}_5$ -PNDs shows the presence of nano-sized dots over  $\text{Fe}_2\text{TiO}_5$  nanostructure (Figure S15(d)). As shown in Figure S15(e), the HRTEM of the composite photoanode shows the presence of two distinct d-spacing correspond to  $\text{Fe}_2\text{TiO}_5$  (0.35 nm, (110) plane) and PNDs (0.19 nm, (200) plane).

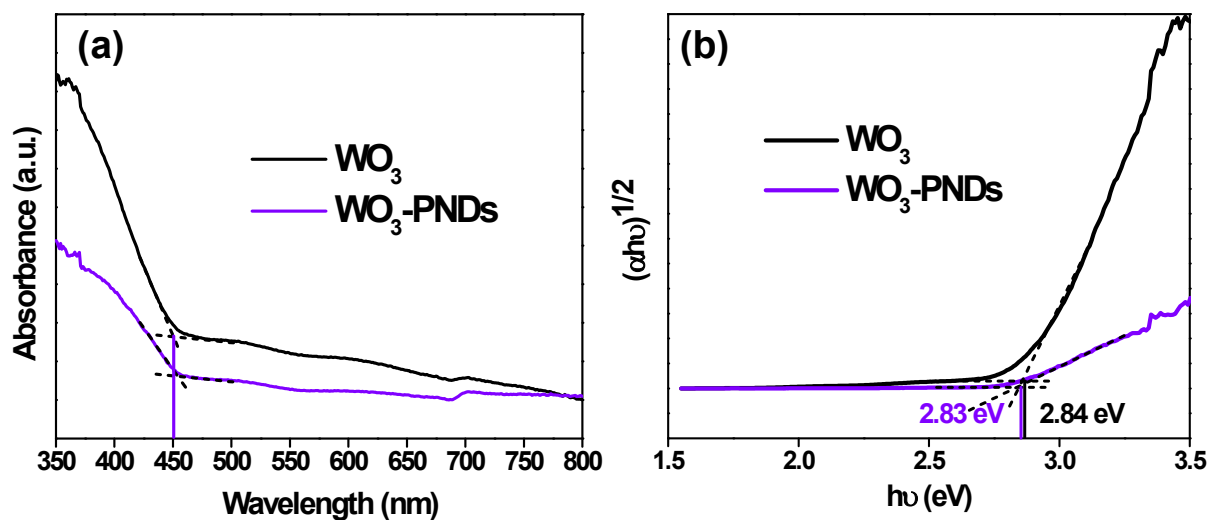

**Figure S16.** (a) UV-visible absorption spectra and (b) extracted band gap of  $\text{WO}_3$  and  $\text{WO}_3$ -PNDs from Tauc plot.

The band gap of  $\text{WO}_3$  and  $\text{WO}_3$ -PNDs was obtained from the absorption spectra shown in Figure S16(a). The band gap of the composite photoanode is found to be similar to bare  $\text{WO}_3$  with negligible change.

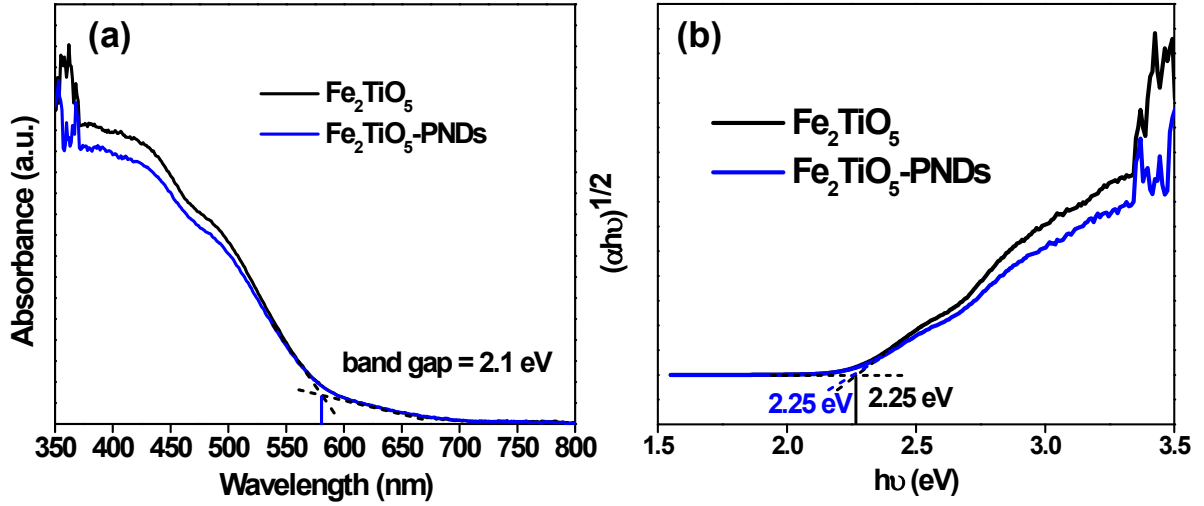

**Figure S17.** (a) UV-visible absorption spectra and (b) extracted band gap of Fe<sub>2</sub>TiO<sub>5</sub> and Fe<sub>2</sub>TiO<sub>5</sub>-PNDs from Tauc plot.

The band gap of Fe<sub>2</sub>TiO<sub>5</sub> and Fe<sub>2</sub>TiO<sub>5</sub>-PNDs was obtained from the absorption spectra shown in Figure S17(a). The band gap of the composite photoanode is found to be similar to bare Fe<sub>2</sub>TiO<sub>5</sub> with no change.

The conduction band (CB) and valence band (VB) of the WO<sub>3</sub> and Fe<sub>2</sub>TiO<sub>5</sub> photoanodes were calculated using the following equation:<sup>2</sup>

$$E_{CB} = \chi - E_e + 0.5 E_g; E_{VB} = E_{CB} + E_g \quad (6)$$

where  $\chi$  represents the absolute electronegativity of the semiconductor,  $E_e$  is the energy of free electrons on the hydrogen scale (about 4.5 eV),  $E_g$  is the band gap of the semiconductor.

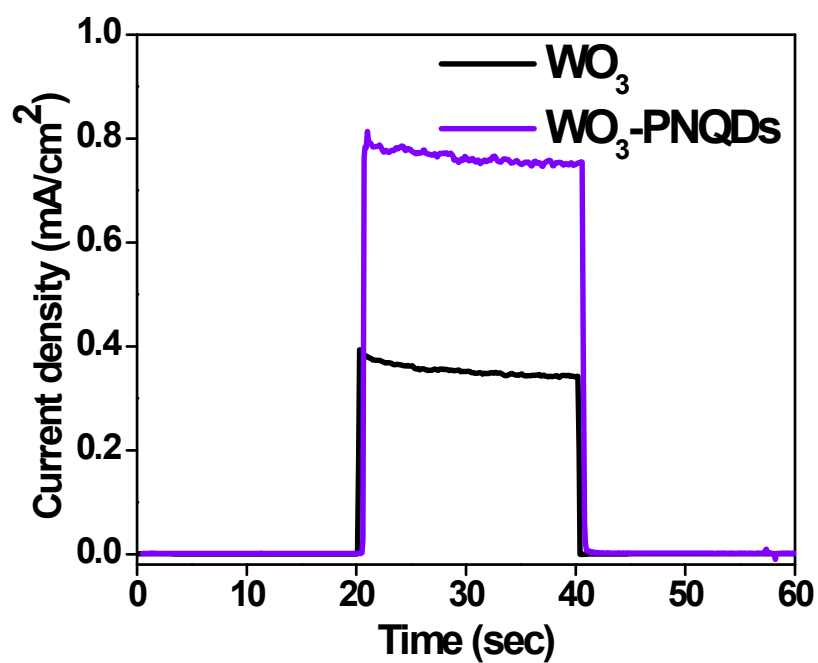

**Figure S18.** Transient photocurrent responses of WO<sub>3</sub> and WO<sub>3</sub>-PNDs.

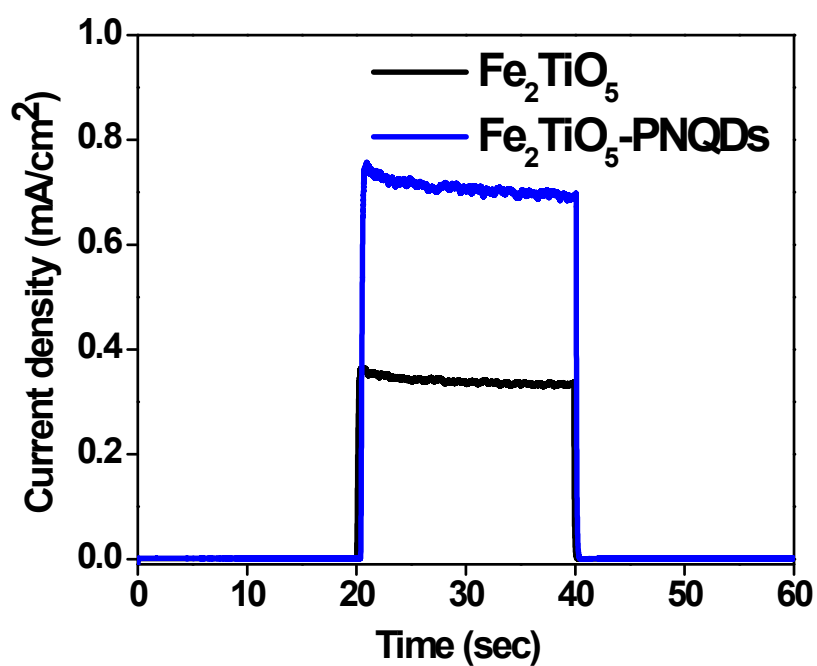

**Figure S19.** Transient photocurrent responses of Fe<sub>2</sub>TiO<sub>5</sub> and Fe<sub>2</sub>TiO<sub>5</sub>-PNDs.

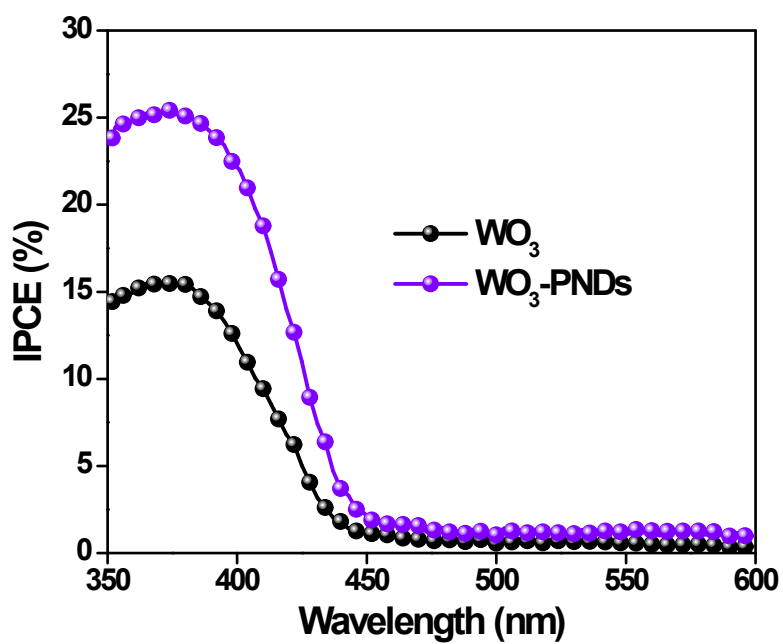

**Figure S20.** Incident photon-to-current efficiencies (IPCEs) of WO<sub>3</sub> and WO<sub>3</sub>-PNDs photoanodes at 1.23V vs. RHE.

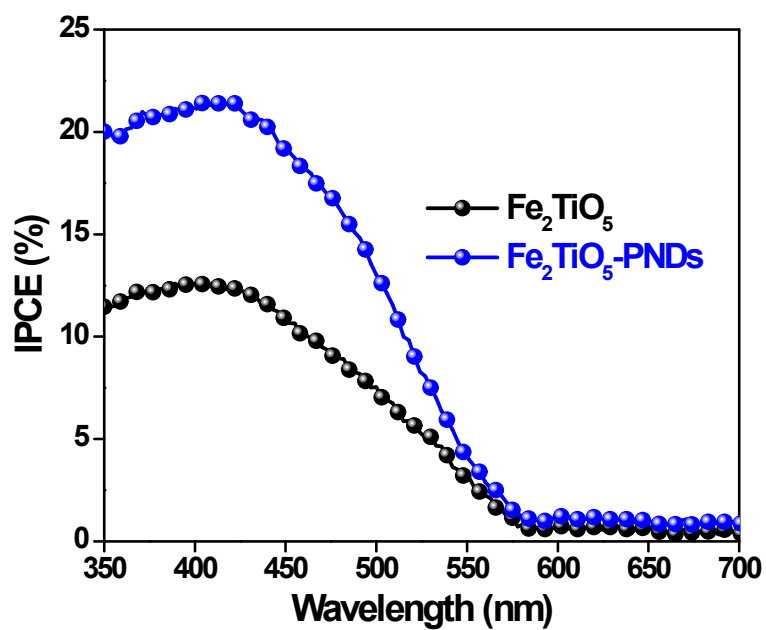

**Figure S21.** Incident photon-to-current efficiencies (IPCEs) of Fe<sub>2</sub>TiO<sub>5</sub> and Fe<sub>2</sub>TiO<sub>5</sub>-PNDs photoanodes at 1.23V vs. RHE.

## References:

1. T. W. Kim and K.-S. Choi, *Science*, 2014, **343**, 990–994.
2. Y. Wang, X. Zhang, J. Liu, Y. Wang, D. Duan and C. Fan, *Mater. Sci. Semicond. Process*, 2015, **40**, 613–620.
